# Supplementary material
Source: Research Square preprint supplement (doi:10.21203/rs.3.rs-10192367/v1)
Supplement: Supplementary file 1 [file 27c67201ba4d433924cb0943.docx]

1. Systematic noble gas isotope analyses confirm that helium distribution is controlled by fluid migration rather than just source rock input.
2. Open-system fluid activity prevails in the Sinian reservoirs, whereas the Cambrian is featured by a relatively closed fluid system.
3. Quantitative calculation quantifies the contribution of water-dissolved helium and indigenous radiogenic helium in different sequences.
4. Tectonic-pressure coupling effect is the key factor leading to abnormally low helium concentration in Cambrian reservoirs.
