# Supplementary material
Source: Research Square preprint supplement (doi:10.21203/rs.3.rs-10192367/v1)
Supplement: Supplementary file 2 [file e84646a2b5549aacd96b5fda.docx]

**Graphical abstract**


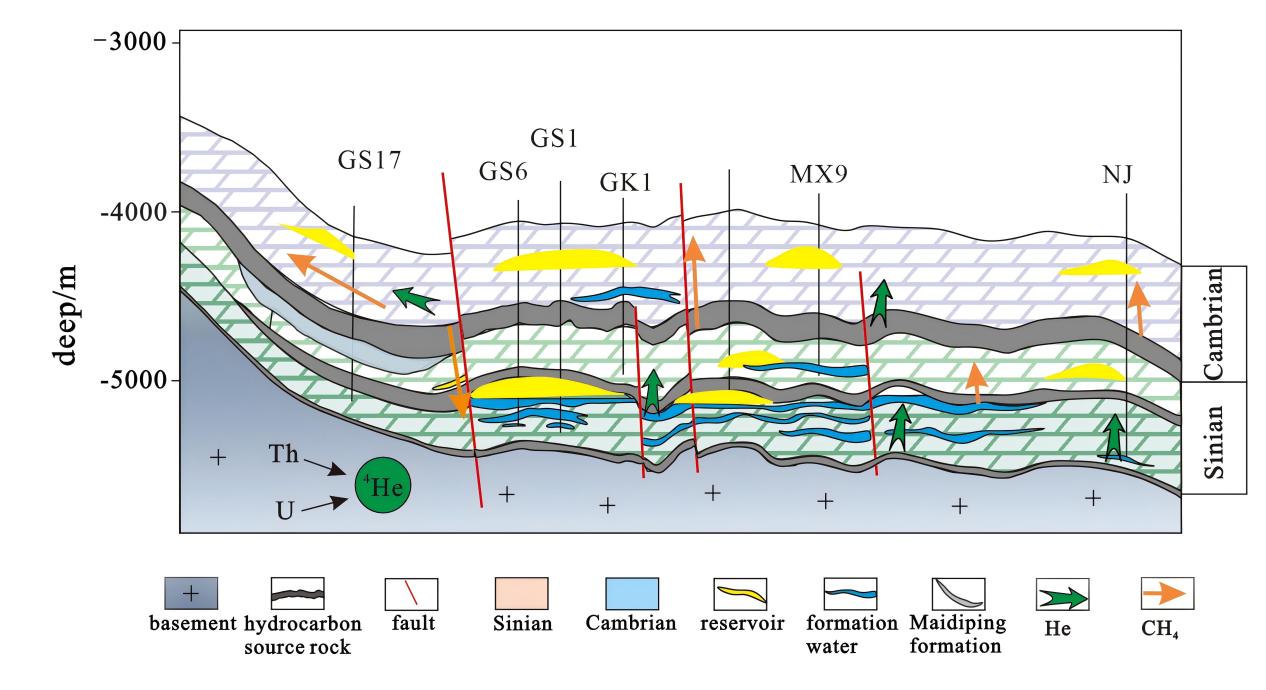


Schematic diagram of helium and natural gas migration pathways in the palaeo-uplift. Helium in the Sinian natural gas is derived from the exsolution of water-dissolved helium during near-basement water circulation; helium in the Cambrian system is derived from source rock generation and minor exsolution of water-dissolved helium.
